# Supplementary material
Source: MDPI journal article supplement (https://www.mdpi.com/2306-5710/9/1/12)
Supplement: s1 [file s1 › beverages-1978750-supplementary.pdf]

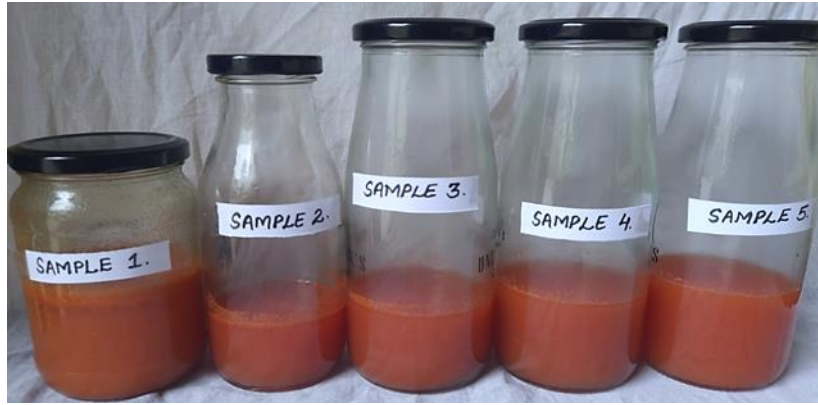

**Figure S1.** Tomato-based pineapple beverage samples.

**Table S1.** Presentation of tomato-based pineapple beverage samples developed for the study

| Ingredients         | Sample 1 | Sample 2 | Sample 3 | Sample 4 | Sample 5 |
|---------------------|----------|----------|----------|----------|----------|
| Tomato juice (%)    | 80       | 70       | 60       | 50       | 25       |
| Pineapple juice (%) | 20       | 30       | 40       | 50       | 75       |
